# Supplementary material for: The Draft Genome of a Hydrogen-producing Cyanobacterium, Arthrospira platensis NIES-46
Source: PubMed Central journal article supplement (PMC6775862; doi:10.7150/jgen.38149), 2019-09-18

**The draft genome of a hydrogen-producing cyanobacterium, *Arthrospira platensis* NIES-46**

Shigekatsu Suzuki\*, Haruyo Yamaguchi, and Masanobu Kawachi

Center for Biology and Environmental Studies, National Institute for Environmental Studies, 16-2

Onogawa, Tsukuba, Ibaraki, Japan

\*Corresponding author (S. Suzuki): e-mail address: [suzuki.shigekatsu@nies.go.jp](mailto:suzuki.shigekatsu@nies.go.jp); postal address: 16-2 Onogawa, Tsukuba, Ibaraki 305-8506 Japan

**Figure S1. Mauve alignment of the NIES-46 and NIES-39 genomes.**

ProgressiveMauve was performed with the default options using the NIES-39 genome as a reference. The NIES-39 (above) and NIES-46 (below) genomes are shown. Corresponding colinear blocks are linked by lines. The red vertical bars in the NIES-46 genome indicate the contigs.

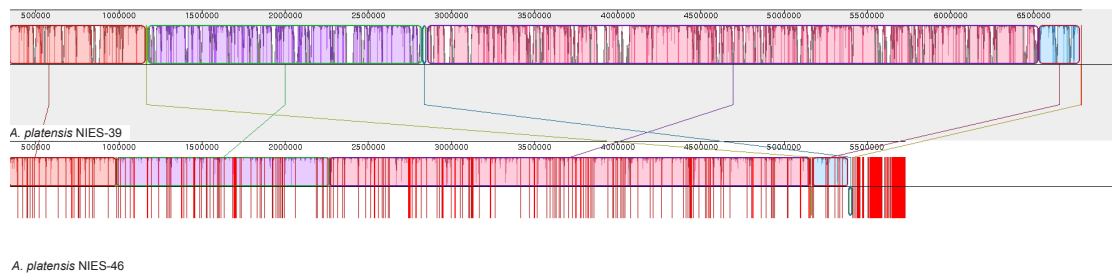

**Figure S2. Gene content of the clade A *Arthrospira* species.**

The functional categories are based on COG classification. The heatmaps represent the number of genes.

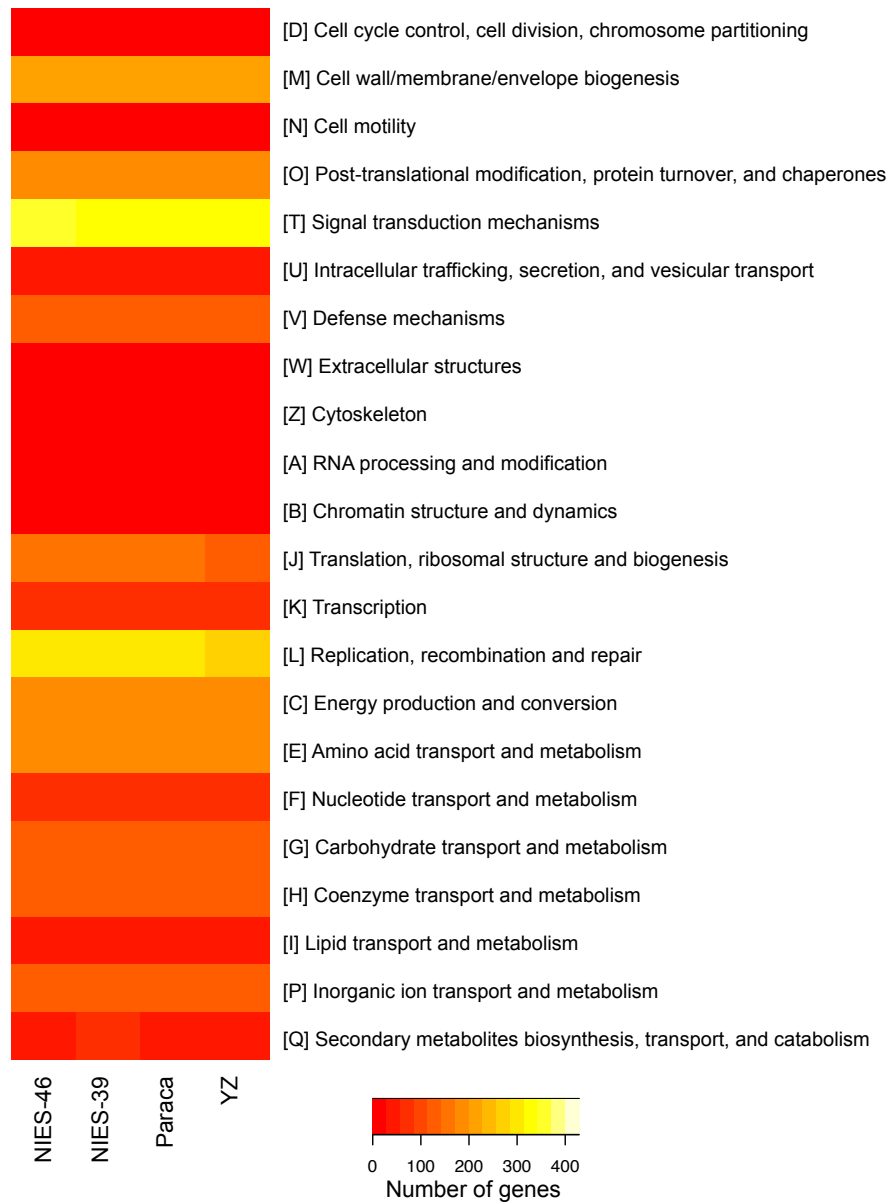

Supplement: jgenv07p0056s1.pdf [file jgenv07p0056s1.pdf]
